# Supplementary material for: Consistency and representativeness of integrated water vapour from ground-based GPS observations and ERA-Interim reanalysis
Source: Copernicus journal article supplement (doi:10.5194/acp-19-9453-2019), 2019-07-24
Supplement: Supplementary file 1 [file acp-19-9453-2019-supplement.pdf]

Supplement of Atmos. Chem. Phys., 19, 9453–9468, 2019  
<https://doi.org/10.5194/acp-19-9453-2019-supplement>  
© Author(s) 2019. This work is distributed under  
the Creative Commons Attribution 4.0 License.

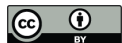

*Supplement of*

## **Consistency and representativeness of integrated water vapour from ground-based GPS observations and ERA-Interim reanalysis**

**Olivier Bock and Ana C. Parracho**

*Correspondence to:* Olivier Bock (bock@ipgp.fr)

The copyright of individual parts of the supplement might differ from the CC BY 4.0 License.

**Supplement Table S1: latitude, longitude, and altitude of GPS stations, altitudes of ERA-Interim for 4 surrounding grid points sorted by distance to the GPS site, altitude difference between GPS and nearest ERA-Interim grid point, and number of days and months with valid GPS data. The nearest grid point with altitudes above or below GPS stations by more than 500m are highlighted.**

| nameGPS | latGPS<br>(deg) | lonGPS<br>(deg) | altGPS<br>(m) | alt1<br>(m) | alt2<br>(m) | alt3<br>(m) | alt4<br>(m) | alt.diff.<br>(m) | Nday | Nmon |
|---------|-----------------|-----------------|---------------|-------------|-------------|-------------|-------------|------------------|------|------|
| albh    | 48.4            | 236.5           | 51            | 255         | 273         | 218         | 251         | -204             | 5737 | 192  |
| algo    | 46.0            | 281.9           | 237           | 338         | 362         | 342         | 338         | -101             | 5569 | 192  |
| alic    | -23.7           | 133.9           | 588           | 547         | 621         | 662         | 719         | 41               | 4630 | 162  |
| ankr    | 39.9            | 32.8            | 939           | 1054        | 1055        | 1144        | 1072        | -115             | 3862 | 136  |
| areq    | -16.5           | 288.5           | 2447          | 3109        | 1803        | 4273        | 3692        | -662             | 4485 | 155  |
| auck    | -36.6           | 174.8           | 98            | 29          | 30          | 24          | 10          | 69               | 5174 | 174  |
| azu1    | 34.1            | 242.1           | 178           | 788         | 558         | 678         | 293         | -610             | 3994 | 140  |
| blyt    | 33.6            | 245.3           | 119           | 341         | 424         | 209         | 256         | -222             | 5629 | 189  |
| bor1    | 52.3            | 17.1            | 89            | 88          | 78          | 119         | 124         | 1                | 5560 | 191  |
| bran    | 34.2            | 241.7           | 280           | 678         | 293         | 788         | 558         | -398             | 5447 | 184  |
| braz    | -15.9           | 312.1           | 1119          | 976         | 921         | 874         | 839         | 143              | 4245 | 153  |
| brmu    | 32.4            | 295.3           | 23            | 0           | 0           | 0           | 0           | 23               | 5322 | 184  |
| brus    | 50.8            | 4.4             | 104           | 68          | 40          | 186         | 120         | 36               | 5339 | 180  |
| cagl    | 39.1            | 9.0             | 192           | 73          | 39          | 265         | 134         | 119              | 4954 | 172  |
| cas1    | -66.3           | 110.5           | 39            | 106         | 372         | 538         | 628         | -67              | 4829 | 171  |
| ccjm    | 27.1            | 142.2           | 161           | 1           | 0           | -1          | 0           | 160              | 5161 | 178  |
| cedu    | -31.9           | 133.8           | 154           | 145         | 26          | 175         | 106         | 9                | 3775 | 133  |
| cfag    | -31.6           | 291.8           | 680           | 995         | 675         | 859         | 522         | -315             | 4713 | 162  |
| chat    | -44.0           | 183.4           | 48            | 1           | 1           | 1           | 1           | 47               | 5170 | 173  |
| chil    | 34.3            | 242.0           | 1601          | 788         | 678         | 558         | 293         | 813              | 5158 | 173  |
| chur    | 58.8            | 265.9           | 29            | 19          | 50          | -1          | 8           | 10               | 5422 | 186  |
| cit1    | 34.1            | 241.9           | 249           | 678         | 788         | 293         | 558         | -429             | 4902 | 166  |
| clar    | 34.1            | 242.3           | 407           | 558         | 788         | 794         | 885         | -151             | 5242 | 177  |
| cmp9    | 34.4            | 241.6           | 1172          | 678         | 788         | 293         | 558         | 494              | 5104 | 175  |
| coco    | -12.2           | 96.8            | 5             | 0           | 0           | 0           | 0           | 5                | 4342 | 154  |
| coso    | 36.0            | 242.2           | 1485          | 1322        | 1327        | 1014        | 967         | 163              | 4787 | 161  |
| crfp    | 34.0            | 242.9           | 721           | 794         | 885         | 558         | 788         | -73              | 5597 | 186  |
| cro1    | 17.8            | 295.4           | 13            | -1          | -2          | 15          | 5           | 14               | 4212 | 149  |
| csn1    | 34.3            | 241.5           | 296           | 678         | 293         | 648         | 118         | -382             | 4574 | 156  |
| darw    | -12.8           | 131.1           | 75            | 99          | 64          | 154         | 108         | -24              | 3669 | 128  |
| dav1    | -68.6           | 78.0            | 27            | 56          | 3           | 686         | 323         | -29              | 4168 | 147  |
| dgar    | -7.3            | 72.4            | 10            | 0           | 0           | 0           | 0           | 10               | 3342 | 113  |
| dhlg    | 33.4            | 244.2           | -49           | 447         | 313         | 677         | 508         | -496             | 4890 | 169  |
| drao    | 49.3            | 240.4           | 558           | 1314        | 1277        | 1292        | 1132        | -719             | 5751 | 192  |
| dubo    | 50.3            | 264.1           | 275           | 278         | 321         | 273         | 324         | -3               | 4937 | 165  |
| ebre    | 40.8            | 0.5             | 58            | 111         | 334         | 475         | 467         | -53              | 4999 | 174  |
| fair    | 65.0            | 212.5           | 308           | 391         | 468         | 487         | 548         | -83              | 4972 | 169  |
| fale    | -13.8           | 188.0           | 14            | 36          | 20          | 40          | 22          | -22              | 3694 | 132  |
| flin    | 54.7            | 258.0           | 343           | 307         | 295         | 302         | 284         | 36               | 4777 | 167  |
| gode    | 39.0            | 283.2           | 48            | 46          | 111         | 126         | 193         | 2                | 4826 | 169  |
| gold    | 35.4            | 243.1           | 1018          | 877         | 847         | 1025        | 961         | 141              | 4091 | 138  |
| gope    | 49.9            | 14.8            | 547           | 349         | 482         | 371         | 494         | 198              | 4781 | 165  |
| gras    | 43.8            | 6.9             | 1269          | 665         | 164         | 1137        | 785         | 604              | 4651 | 161  |
| graz    | 47.1            | 15.5            | 491           | 601         | 883         | 436         | 673         | -110             | 5171 | 184  |
| guam    | 13.6            | 144.9           | 147           | 3           | 1           | 2           | 0           | 144              | 4321 | 144  |
| hers    | 50.9            | 0.3             | 32            | 35          | 29          | 7           | 33          | -3               | 4804 | 163  |
| hob2    | -42.8           | 147.4           | 45            | 249         | 365         | 53          | 74          | -204             | 4794 | 167  |
| holb    | 50.6            | 231.9           | 576           | 55          | 61          | 145         | 271         | 521              | 5124 | 172  |
| holp    | 33.9            | 241.8           | 29            | 293         | 558         | 678         | 788         | -264             | 5608 | 188  |
| hrao    | -25.9           | 27.7            | 1389          | 1472        | 1245        | 1442        | 1239        | -83              | 4447 | 150  |
| iisc    | 13.0            | 77.6            | 930           | 787         | 717         | 767         | 725         | 143              | 3497 | 125  |
| irkt    | 52.2            | 104.3           | 541           | 627         | 958         | 655         | 849         | -86              | 4949 | 179  |
| joze    | 52.1            | 21.0            | 110           | 158         | 120         | 161         | 136         | -48              | 5568 | 191  |
| jplm    | 34.2            | 241.8           | 458           | 678         | 788         | 293         | 558         | -220             | 5155 | 174  |
| karr    | -21.0           | 117.1           | 117           | 122         | 143         | -1          | 2           | -5               | 4785 | 170  |
| kely    | 67.0            | 309.1           | 198           | 673         | 806         | 447         | 618         | -475             | 2175 | 94   |
| kerg    | -49.4           | 70.3            | 33            | 34          | 84          | 12          | 27          | -1               | 4837 | 164  |
| kiru    | 67.9            | 21.0            | 362           | 429         | 557         | 523         | 634         | -67              | 5120 | 183  |
| kit3    | 39.1            | 66.9            | 659           | 1178        | 1928        | 863         | 1250        | -519             | 4424 | 166  |

| nameGPS | latGPS<br>(deg) | lonGPS<br>(deg) | altGPS<br>(m) | alt1<br>(m) | alt2<br>(m) | alt3<br>(m) | alt4<br>(m) | alt.diff.<br>(m) | Nday | Nmon |
|---------|-----------------|-----------------|---------------|-------------|-------------|-------------|-------------|------------------|------|------|
| kokb    | 22.1            | 200.3           | 1153          | 22          | 24          | 11          | 12          | 1131             | 4580 | 156  |
| kosg    | 52.2            | 5.8             | 53            | 9           | 27          | -2          | 10          | 44               | 5181 | 179  |
| kour    | 5.3             | 307.2           | 8             | 9           | 43          | -1          | 4           | -1               | 4467 | 163  |
| lama    | 53.9            | 20.7            | 158           | 110         | 93          | 132         | 123         | 48               | 5197 | 176  |
| lbch    | 33.8            | 241.8           | 8             | 293         | 558         | 678         | 788         | -285             | 4553 | 156  |
| leep    | 34.1            | 241.7           | 520           | 678         | 293         | 788         | 558         | -158             | 5538 | 186  |
| long    | 34.1            | 242.0           | 108           | 558         | 788         | 293         | 678         | -450             | 5182 | 176  |
| lpgs    | -34.9           | 302.1           | 14            | 9           | 22          | 14          | 19          | 5                | 4125 | 150  |
| mac1    | -54.5           | 158.9           | 14            | 1           | 0           | 0           | 1           | 14               | 4647 | 167  |
| madr    | 40.4            | 355.8           | 777           | 854         | 851         | 684         | 715         | -77              | 4477 | 156  |
| mas1    | 27.8            | 344.4           | 155           | 53          | 13          | 65          | 7           | 102              | 5087 | 175  |
| mate    | 40.6            | 16.7            | 490           | 303         | 85          | 112         | 17          | 187              | 5156 | 176  |
| maw1    | -67.6           | 62.9            | 30            | 497         | 536         | 1182        | 1238        | -467             | 4581 | 169  |
| mcm4    | -77.8           | 166.7           | 151           | 187         | 112         | 117         | 48          | -36              | 4196 | 146  |
| mdo1    | 30.7            | 256.0           | 2027          | 1319        | 1176        | 1298        | 1182        | 708              | 5002 | 171  |
| medi    | 44.5            | 11.6            | 10            | 270         | 253         | 112         | 176         | -260             | 5015 | 175  |
| mets    | 60.2            | 24.4            | 76            | 31          | 31          | 82          | 88          | 46               | 4864 | 168  |
| mkea    | 19.8            | 204.5           | 3730          | 563         | 176         | 496         | 221         | 3167             | 4440 | 149  |
| monp    | 32.9            | 243.6           | 1875          | 508         | 539         | 561         | 389         | 1367             | 5300 | 180  |
| nano    | 49.3            | 235.9           | 24            | 405         | 385         | 255         | 226         | -381             | 5438 | 183  |
| nlib    | 41.8            | 268.4           | 240           | 257         | 222         | 275         | 248         | -17              | 4607 | 160  |
| nrc1    | 45.5            | 284.4           | 116           | 198         | 144         | 206         | 178         | -82              | 5280 | 176  |
| onsa    | 57.4            | 11.9            | 9             | 70          | 38          | 9           | 13          | -61              | 4988 | 170  |
| penc    | 47.8            | 19.3            | 248           | 276         | 247         | 126         | 151         | -28              | 4969 | 173  |
| pert    | -31.8           | 115.9           | 45            | 212         | 62          | 205         | 48          | -167             | 5068 | 177  |
| pie1    | 34.3            | 251.9           | 2370          | 2193        | 2184        | 2161        | 2178        | 177              | 4857 | 164  |
| pin1    | 33.6            | 243.5           | 1289          | 677         | 794         | 508         | 539         | 612              | 5562 | 191  |
| pol2    | 42.7            | 74.7            | 1755          | 1865        | 1793        | 2605        | 2502        | -110             | 4495 | 152  |
| pots    | 52.4            | 13.1            | 104           | 55          | 51          | 112         | 110         | 50               | 5374 | 186  |
| quin    | 40.0            | 239.1           | 1129          | 1369        | 820         | 1554        | 1197        | -240             | 3973 | 137  |
| reyk    | 64.1            | 338.0           | 27            | 245         | 41          | 71          | 25          | -218             | 4787 | 169  |
| rock    | 34.2            | 241.3           | 588           | 678         | 293         | 648         | 118         | -90              | 5287 | 180  |
| sant    | -33.1           | 289.3           | 696           | 2153        | 671         | 1980        | 566         | -1457            | 4394 | 152  |
| shao    | 31.1            | 121.2           | 12            | 12          | 0           | 20          | 3           | 0                | 3379 | 118  |
| sio3    | 32.9            | 242.8           | 70            | 539         | 149         | 389         | 15          | -469             | 5549 | 189  |
| sni1    | 33.2            | 240.5           | 277           | -20         | -14         | 118         | 44          | 297              | 4187 | 139  |
| spk1    | 34.1            | 241.4           | 476           | 293         | 678         | 118         | 648         | 183              | 4838 | 165  |
| stjo    | 47.6            | 307.3           | 143           | 17          | 17          | 52          | 63          | 126              | 5536 | 190  |
| svtl    | 60.5            | 29.8            | 61            | 30          | 33          | 34          | 31          | 31               | 4932 | 169  |
| syog    | -69.0           | 39.6            | 28            | 429         | 157         | 698         | 412         | -401             | 4875 | 173  |
| tabl    | 34.4            | 242.3           | 2261          | 788         | 885         | 558         | 794         | 1473             | 5206 | 174  |
| tidb    | -35.4           | 149.0           | 646           | 682         | 655         | 774         | 863         | -36              | 4647 | 158  |
| tow2    | -19.3           | 147.1           | 30            | 177         | 37          | 26          | -4          | -147             | 5199 | 182  |
| trak    | 33.6            | 242.2           | 151           | 558         | 293         | 149         | -8          | -407             | 5461 | 189  |
| tskb    | 36.1            | 140.1           | 28            | 109         | 362         | 344         | 585         | -81              | 5143 | 174  |
| uclp    | 34.1            | 241.6           | 147           | 293         | 678         | 558         | 788         | -146             | 5031 | 168  |
| uclu    | 48.9            | 234.5           | 29            | 119         | 79          | 351         | 343         | -90              | 5510 | 184  |
| usc1    | 34.0            | 241.7           | 57            | 293         | 678         | 558         | 788         | -236             | 5079 | 170  |
| usud    | 36.1            | 138.4           | 1466          | 990         | 765         | 774         | 739         | 476              | 4868 | 164  |
| vill    | 40.4            | 356.0           | 595           | 851         | 854         | 715         | 684         | -256             | 5126 | 181  |
| vndp    | 34.6            | 239.4           | 25            | 88          | 398         | 259         | 369         | -63              | 5186 | 178  |
| wes2    | 42.6            | 288.5           | 114           | 113         | 250         | 60          | 149         | 1                | 4569 | 165  |
| whc1    | 34.0            | 242.0           | 129           | 558         | 293         | 788         | 678         | -429             | 5132 | 172  |
| whit    | 60.8            | 224.8           | 1420          | 1108        | 1132        | 1060        | 1045        | 313              | 4970 | 168  |
| will    | 52.2            | 237.8           | 1110          | 1046        | 1150        | 1175        | 1128        | 64               | 5550 | 184  |
| wlsn    | 34.2            | 241.9           | 1739          | 788         | 678         | 558         | 293         | 951              | 4787 | 160  |
| wslr    | 50.1            | 237.1           | 926           | 1344        | 1347        | 593         | 832         | -418             | 5097 | 170  |
| wtzr    | 49.1            | 12.9            | 619           | 507         | 477         | 507         | 533         | 112              | 5094 | 174  |
| wuhn    | 30.5            | 114.4           | 40            | 57          | 102         | 95          | 140         | -17              | 4955 | 173  |
| yell    | 62.5            | 245.5           | 207           | 184         | 217         | 243         | 273         | 23               | 5678 | 192  |
| zimm    | 46.9            | 7.5             | 907           | 777         | 1378        | 615         | 1100        | 130              | 5636 | 192  |

**Supplement Table S2: mean GPS IWV, standard deviation of GPS IWV, mean GPS formal error, absolute and relative mean deviation of IWV from 4 grid points, absolute and relative mean difference of IWV (ERA-Interim - GPS), absolute and relative standard deviation of difference of IWV (ERA-Interim - GPS), minimum absolute and relative standard deviation of difference of IWV (ERA-Interim - GPS) from 4 grid points. Differences exceeding the acceptance limit and outlying stations are highlighted in red.**

| nameGPS | meanGPS<br>(kg/m2) | stdGPS<br>(kg/m2) | errGPS<br>(kg/m2) | meanR<br>(kg/m2) | relmeanR<br>(%) | meanD<br>(kg/m2) | relmeanD<br>(%) | stdD<br>(kg/m2) | relstdD<br>(%) | min4stdD<br>(kg/m2) | min4relstdD<br>(%) |
|---------|--------------------|-------------------|-------------------|------------------|-----------------|------------------|-----------------|-----------------|----------------|---------------------|--------------------|
| albh    | 15.25              | 5.76              | 0.28              | 1.78             | 11.1            | 0.88             | 5.80            | 1.28            | 8.40           | 1.32                | 8.70               |
| algo    | 14.11              | 9.45              | 0.28              | 1.71             | 11.5            | 0.69             | 4.90            | 1.00            | 7.10           | 1.05                | 7.50               |
| alic    | 18.04              | 10.70             | 0.29              | 2.02             | 11.4            | -0.28            | -1.60           | 1.68            | 9.30           | 1.83                | 10.20              |
| ankr    | 12.89              | 5.60              | 0.28              | 1.52             | 11.2            | 0.63             | 4.90            | 1.06            | 8.20           | 1.09                | 8.50               |
| areq    | 11.62              | 6.66              | 0.35              | 6.41             | 55.1            | 0.01             | 0.10            | 2.43            | 20.90          | 2.55                | 22.00              |
| auck    | 18.40              | 6.98              | 0.27              | 2.17             | 11.5            | 0.40             | 2.20            | 0.87            | 4.70           | 0.91                | 4.90               |
| azu1    | 16.01              | 7.43              | 0.37              | 2.23             | 14.6            | -0.72            | -4.50           | 2.02            | 12.60          | 2.07                | 12.90              |
| blyt    | 15.56              | 10.19             | 0.27              | 2.23             | 14.3            | 0.06             | 0.40            | 2.30            | 14.80          | 2.33                | 15.00              |
| bor1    | 15.11              | 7.69              | 0.29              | 1.53             | 9.6             | 0.77             | 5.10            | 0.81            | 5.30           | 0.83                | 5.50               |
| bran    | 15.24              | 6.84              | 0.38              | 2.26             | 15.3            | -0.46            | -3.00           | 1.80            | 11.80          | 1.89                | 12.40              |
| braz    | 27.08              | 9.58              | 0.31              | 2.10             | 7.9             | -0.55            | -2.00           | 1.87            | 6.90           | 1.88                | 6.90               |
| brmu    | 29.70              | 11.33             | 0.35              | 2.84             | 9.5             | 0.18             | 0.60            | 1.21            | 4.10           | 1.33                | 4.50               |
| brus    | 15.78              | 6.87              | 0.29              | 1.72             | 10.3            | 0.86             | 5.50            | 0.77            | 4.90           | 0.81                | 5.10               |
| cagl    | 18.03              | 6.48              | 0.29              | 2.26             | 12.5            | 0.15             | 0.80            | 1.10            | 6.10           | 1.15                | 6.40               |
| cas1    | 4.21               | 2.08              | 0.25              | 0.69             | 16.4            | -0.03            | -0.70           | 0.65            | 15.40          | 0.68                | 16.20              |
| ccjm    | 34.75              | 13.04             | 0.32              | 3.30             | 9.6             | -0.39            | -1.10           | 1.80            | 5.20           | 1.90                | 5.50               |
| cedu    | 16.08              | 7.01              | 0.27              | 1.98             | 12.3            | 0.01             | 0.10            | 1.17            | 7.30           | 1.32                | 8.20               |
| cfag    | 16.57              | 7.83              | 0.30              | 3.49             | 15.6            | 5.76             | 34.80           | 3.67            | 22.20          | 3.50                | 21.10              |
| chat    | 15.41              | 5.88              | 0.29              | 1.68             | 10.7            | 0.23             | 1.50            | 0.77            | 5.00           | 0.85                | 5.50               |
| chil    | 7.74               | 4.63              | 0.32              | 1.60             | 21.0            | -0.09            | -1.20           | 0.94            | 12.20          | 0.99                | 12.80              |
| chur    | 9.24               | 7.35              | 0.28              | 1.18             | 12.0            | 0.58             | 6.20            | 0.67            | 7.30           | 0.77                | 8.30               |
| cit1    | 15.02              | 7.01              | 0.28              | 2.26             | 15.1            | -0.05            | -0.30           | 1.84            | 12.20          | 1.91                | 12.70              |
| clar    | 14.52              | 6.89              | 0.28              | 2.19             | 15.6            | -0.54            | -3.70           | 1.83            | 12.60          | 1.90                | 13.10              |
| cmp9    | 9.88               | 5.15              | 0.30              | 1.94             | 20.3            | -0.31            | -3.10           | 1.15            | 11.60          | 1.20                | 12.10              |
| coco    | 42.58              | 9.84              | 0.28              | 3.03             | 7.2             | -0.43            | -1.00           | 1.53            | 3.60           | 1.62                | 3.80               |
| coso    | 8.00               | 4.61              | 0.27              | 1.74             | 18.6            | 1.37             | 17.20           | 1.33            | 16.60          | 1.34                | 16.70              |
| crfp    | 12.83              | 6.65              | 0.27              | 2.03             | 16.6            | -0.59            | -4.60           | 1.72            | 13.40          | 1.82                | 14.10              |
| cro1    | 37.92              | 8.44              | 0.45              | 2.71             | 7.0             | 0.69             | 1.80            | 1.66            | 4.40           | 1.74                | 4.60               |
| csn1    | 14.19              | 6.66              | 0.27              | 2.42             | 16.8            | 0.21             | 1.50            | 1.73            | 12.20          | 1.82                | 12.80              |
| darw    | 38.22              | 14.37             | 0.32              | 3.52             | 9.3             | -0.25            | -0.70           | 1.71            | 4.50           | 1.82                | 4.80               |
| dav1    | 3.74               | 1.86              | 0.25              | 0.51             | 14.7            | -0.26            | -7.00           | 0.45            | 12.10          | 0.47                | 12.60              |
| dgar    | 48.29              | 8.10              | 0.29              | 2.87             | 6.1             | -0.83            | -1.70           | 1.88            | 3.90           | 2.00                | 4.10               |
| dhlq    | 16.23              | 10.23             | 0.26              | 2.63             | 15.5            | 0.69             | 4.30            | 2.70            | 16.60          | 2.64                | 16.30              |
| drao    | 12.28              | 5.25              | 0.25              | 1.32             | 10.1            | 0.72             | 5.80            | 1.17            | 9.50           | 1.23                | 10.00              |
| dubo    | 12.61              | 8.97              | 0.30              | 1.48             | 10.9            | 0.95             | 7.50            | 1.07            | 8.40           | 1.08                | 8.50               |
| ebre    | 19.36              | 8.64              | 0.28              | 2.78             | 13.8            | 0.71             | 3.70            | 1.73            | 9.00           | 1.90                | 9.80               |
| fair    | 8.84               | 6.43              | 0.31              | 0.93             | 9.6             | 0.85             | 9.60            | 0.94            | 10.60          | 0.99                | 11.10              |
| fale    | 47.62              | 8.94              | 0.26              | 3.01             | 6.3             | -0.02            | 0.00            | 1.86            | 3.90           | 2.10                | 4.40               |
| flin    | 11.22              | 7.77              | 0.27              | 1.28             | 10.8            | 0.69             | 6.10            | 0.92            | 8.20           | 0.92                | 8.20               |
| gode    | 20.49              | 12.49             | 0.30              | 2.45             | 11.5            | 0.88             | 4.30            | 1.13            | 5.50           | 1.20                | 5.90               |
| gold    | 9.83               | 5.56              | 0.29              | 1.61             | 15.1            | 0.82             | 8.40            | 1.21            | 12.30          | 1.20                | 12.20              |
| gope    | 13.82              | 6.79              | 0.34              | 1.54             | 11.0            | 0.24             | 1.80            | 0.81            | 5.90           | 0.90                | 6.50               |
| gras    | 10.19              | 5.35              | 0.28              | 2.06             | 19.3            | 0.48             | 4.70            | 1.10            | 10.80          | 1.25                | 12.30              |
| graz    | 14.87              | 7.66              | 0.27              | 1.90             | 11.9            | 1.09             | 7.30            | 1.04            | 7.00           | 1.11                | 7.50               |
| guam    | 44.46              | 9.76              | 0.36              | 2.93             | 6.7             | -0.63            | -1.40           | 1.59            | 3.60           | 1.61                | 3.60               |
| hers    | 16.20              | 6.58              | 0.26              | 1.91             | 11.3            | 0.81             | 5.00            | 0.80            | 4.90           | 0.86                | 5.30               |
| hob2    | 14.94              | 5.13              | 0.26              | 1.77             | 11.1            | 0.98             | 6.60            | 0.84            | 5.60           | 0.84                | 5.60               |
| holb    | 11.99              | 5.21              | 0.30              | 1.56             | 12.8            | 0.16             | 1.30            | 0.76            | 6.40           | 0.86                | 7.20               |
| holp    | 16.77              | 7.15              | 0.31              | 2.40             | 14.4            | -0.14            | -0.90           | 1.76            | 10.50          | 1.79                | 10.70              |
| hrao    | 16.88              | 8.81              | 0.33              | 1.99             | 11.6            | 0.31             | 1.80            | 1.25            | 7.40           | 1.40                | 8.30               |
| iisc    | 31.44              | 11.35             | 0.32              | 2.52             | 8.0             | 0.14             | 0.50            | 2.30            | 7.30           | 2.37                | 7.50               |
| irkt    | 10.29              | 8.89              | 0.33              | 1.28             | 11.3            | 0.99             | 9.60            | 1.25            | 12.20          | 1.24                | 12.00              |
| joze    | 14.93              | 7.85              | 0.33              | 1.50             | 9.5             | 0.90             | 6.00            | 0.83            | 5.60           | 0.93                | 6.20               |
| jplm    | 14.05              | 6.62              | 0.39              | 2.20             | 16.3            | -0.52            | -3.70           | 1.70            | 12.10          | 1.82                | 13.00              |
| karr    | 24.17              | 12.86             | 0.30              | 2.98             | 12.3            | -0.01            | 0.00            | 1.70            | 7.00           | 1.70                | 7.00               |
| kely    | 7.70               | 4.68              | 0.30              | 0.82             | 9.9             | 0.64             | 8.40            | 0.86            | 11.20          | 0.88                | 11.50              |
| kerg    | 10.23              | 4.40              | 0.34              | 1.38             | 12.6            | 0.73             | 7.10            | 0.95            | 9.30           | 0.96                | 9.40               |
| kiru    | 9.25               | 5.79              | 0.31              | 0.87             | 8.6             | 0.96             | 10.30           | 0.84            | 9.10           | 0.87                | 9.40               |
| kit3    | 13.68              | 5.89              | 0.43              | 4.12             | 25.2            | 2.70             | 19.70           | 3.59            | 26.20          | 3.16                | 23.10              |

| nameGPS | meanGPS<br>(kg/m2) | stdGPS<br>(kg/m2) | errGPS<br>(kg/m2) | meanR<br>(kg/m2) | relmeanR<br>(%) | meanD<br>(kg/m2) | relmeanD<br>(%) | stdD<br>(kg/m2) | relstdD<br>(%) | min4stdD<br>(kg/m2) | min4relstdD<br>(%) |
|---------|--------------------|-------------------|-------------------|------------------|-----------------|------------------|-----------------|-----------------|----------------|---------------------|--------------------|
| kokb    | 15.15              | 5.41              | 0.33              | 1.84             | 12.2            | -0.09            | -0.60           | 1.23            | 8.10           | 1.35                | 8.90               |
| kosg    | 16.10              | 6.91              | 0.25              | 1.72             | 10.4            | 0.51             | 3.10            | 0.70            | 4.40           | 0.82                | 5.10               |
| kour    | 48.32              | 6.58              | 0.34              | 3.07             | 6.4             | -0.57            | -1.20           | 1.76            | 3.60           | 1.81                | 3.70               |
| lama    | 14.22              | 7.44              | 0.26              | 1.48             | 10.0            | 0.64             | 4.50            | 0.87            | 6.10           | 0.88                | 6.20               |
| lbch    | 16.77              | 7.27              | 0.36              | 2.43             | 14.4            | 0.05             | 0.30            | 1.72            | 10.20          | 1.74                | 10.40              |
| leep    | 12.67              | 6.19              | 0.28              | 2.19             | 16.8            | 0.34             | 2.70            | 1.53            | 12.10          | 1.59                | 12.50              |
| long    | 16.65              | 7.35              | 0.43              | 2.31             | 14.5            | -0.73            | -4.40           | 2.24            | 13.40          | 2.32                | 14.00              |
| lpgs    | 20.36              | 9.27              | 0.46              | 2.79             | 13.3            | 0.65             | 3.20            | 1.54            | 7.60           | 1.67                | 8.20               |
| mac1    | 10.95              | 3.93              | 0.27              | 1.24             | 11.0            | 0.32             | 2.90            | 0.58            | 5.30           | 0.62                | 5.70               |
| madr    | 13.80              | 5.59              | 0.31              | 1.65             | 11.5            | 0.55             | 4.00            | 1.13            | 8.20           | 1.16                | 8.40               |
| mas1    | 18.18              | 6.29              | 0.37              | 1.95             | 10.4            | 0.66             | 3.60            | 1.36            | 7.50           | 1.36                | 7.50               |
| mate    | 15.80              | 6.38              | 0.33              | 1.99             | 12.2            | 0.47             | 3.00            | 1.13            | 7.10           | 1.21                | 7.70               |
| maw1    | 2.41               | 1.74              | 0.31              | 0.64             | 22.5            | 0.45             | 18.80           | 0.48            | 19.80          | 0.49                | 20.50              |
| mcm4    | 2.56               | 1.66              | 0.31              | 0.23             | 10.9            | -0.42            | -16.50          | 0.81            | 31.60          | 0.80                | 31.40              |
| mdo1    | 11.08              | 7.31              | 0.34              | 1.77             | 15.4            | 0.44             | 4.00            | 1.23            | 11.10          | 1.28                | 11.60              |
| medi    | 19.21              | 8.47              | 0.32              | 2.18             | 10.9            | 0.78             | 4.10            | 1.34            | 7.00           | 1.42                | 7.40               |
| mets    | 12.21              | 6.78              | 0.23              | 1.37             | 10.7            | 0.52             | 4.30            | 0.72            | 5.90           | 0.80                | 6.60               |
| mkea    | 2.79               | 2.34              | 0.33              | 0.56             | 18.4            | 0.25             | 9.00            | 0.61            | 22.00          | 0.61                | 22.00              |
| monp    | 7.14               | 5.38              | 0.26              | 1.45             | 20.3            | -0.03            | -0.40           | 0.97            | 13.60          | 0.97                | 13.60              |
| nano    | 15.69              | 6.01              | 0.28              | 1.75             | 10.8            | 0.61             | 3.90            | 1.41            | 9.00           | 1.39                | 8.90               |
| nlib    | 17.97              | 11.40             | 0.37              | 2.17             | 11.9            | 0.31             | 1.70            | 1.25            | 6.90           | 1.30                | 7.20               |
| nrc1    | 15.09              | 10.11             | 0.28              | 1.93             | 12.1            | 0.83             | 5.50            | 1.00            | 6.70           | 1.12                | 7.40               |
| onsa    | 13.89              | 6.86              | 0.24              | 1.55             | 10.5            | 0.79             | 5.70            | 0.78            | 5.60           | 0.90                | 6.50               |
| penc    | 16.24              | 7.89              | 0.28              | 1.62             | 9.6             | 0.52             | 3.20            | 0.84            | 5.20           | 0.91                | 5.60               |
| pert    | 17.12              | 6.55              | 0.34              | 2.24             | 12.4            | 0.97             | 5.70            | 0.99            | 5.80           | 1.15                | 6.70               |
| pie1    | 8.58               | 6.07              | 0.32              | 1.29             | 14.4            | 0.33             | 3.80            | 1.09            | 12.70          | 1.13                | 13.20              |
| pin1    | 9.21               | 6.23              | 0.27              | 1.70             | 18.2            | 0.14             | 1.60            | 1.47            | 16.00          | 1.47                | 15.90              |
| pol2    | 9.12               | 5.57              | 0.28              | 1.81             | 16.7            | 1.71             | 18.70           | 1.93            | 21.20          | 1.89                | 20.70              |
| pots    | 14.90              | 7.28              | 0.27              | 1.56             | 9.8             | 0.94             | 6.30            | 0.75            | 5.10           | 0.81                | 5.50               |
| quin    | 10.96              | 4.17              | 0.30              | 1.75             | 16.2            | -0.14            | -1.30           | 1.18            | 10.80          | 1.19                | 10.90              |
| reyk    | 11.48              | 5.30              | 0.28              | 1.26             | 10.3            | 0.69             | 6.00            | 0.70            | 6.10           | 0.78                | 6.80               |
| rock    | 12.33              | 5.93              | 0.28              | 2.40             | 18.9            | 0.34             | 2.80            | 1.50            | 12.10          | 1.65                | 13.30              |
| sant    | 12.28              | 4.66              | 0.28              | 2.86             | 25.7            | -1.16            | -9.40           | 2.34            | 19.10          | 2.48                | 20.20              |
| shao    | 27.66              | 18.21             | 0.37              | 3.38             | 11.9            | 0.73             | 2.60            | 1.41            | 5.10           | 1.76                | 6.40               |
| sio3    | 16.32              | 7.70              | 0.29              | 2.41             | 14.5            | 0.23             | 1.40            | 1.52            | 9.30           | 1.61                | 9.80               |
| sni1    | 12.49              | 5.91              | 0.25              | 1.91             | 14.5            | 0.71             | 5.70            | 1.28            | 10.20          | 1.29                | 10.30              |
| spk1    | 12.57              | 6.11              | 0.27              | 2.42             | 18.5            | 0.49             | 3.90            | 1.49            | 11.80          | 1.54                | 12.20              |
| stjo    | 14.32              | 8.76              | 0.28              | 2.05             | 13.8            | 0.59             | 4.10            | 0.84            | 5.80           | 1.07                | 7.50               |
| svtl    | 12.63              | 7.38              | 0.30              | 1.36             | 10.3            | 0.60             | 4.70            | 0.86            | 6.80           | 0.88                | 7.00               |
| syog    | 3.00               | 1.78              | 0.34              | 0.75             | 20.8            | 0.62             | 20.70           | 0.58            | 19.40          | 0.58                | 19.40              |
| tabl    | 5.86               | 3.79              | 0.33              | 1.22             | 21.6            | -0.24            | -4.10           | 0.69            | 11.80          | 0.71                | 12.10              |
| tidb    | 13.97              | 6.58              | 0.30              | 1.90             | 12.9            | 0.70             | 5.00            | 1.06            | 7.60           | 1.12                | 8.00               |
| tow2    | 33.37              | 13.02             | 0.28              | 3.46             | 10.4            | -0.08            | -0.20           | 1.61            | 4.80           | 1.75                | 5.20               |
| trak    | 15.24              | 7.10              | 0.34              | 2.28             | 14.4            | 0.55             | 3.60            | 1.71            | 11.20          | 1.74                | 11.40              |
| tskb    | 24.13              | 16.59             | 0.33              | 3.09             | 12.1            | 1.34             | 5.60            | 1.26            | 5.20           | 1.33                | 5.50               |
| uclp    | 15.40              | 6.98              | 0.29              | 2.30             | 14.8            | 0.13             | 0.80            | 1.72            | 11.20          | 1.72                | 11.20              |
| uclu    | 15.60              | 6.05              | 0.30              | 2.02             | 12.6            | 0.44             | 2.90            | 0.98            | 6.30           | 1.06                | 6.80               |
| usc1    | 15.82              | 7.21              | 0.39              | 2.38             | 14.6            | 0.52             | 3.30            | 1.77            | 11.20          | 1.79                | 11.30              |
| usud    | 13.29              | 10.31             | 0.33              | 2.06             | 15.3            | 0.22             | 1.60            | 1.10            | 8.30           | 1.13                | 8.50               |
| vill    | 14.74              | 5.88              | 0.31              | 1.72             | 11.1            | 0.75             | 5.10            | 1.16            | 7.90           | 1.19                | 8.10               |
| vndp    | 14.99              | 5.93              | 0.29              | 2.85             | 18.1            | 0.76             | 5.10            | 1.39            | 9.30           | 1.40                | 9.30               |
| wes2    | 16.77              | 10.87             | 0.33              | 2.18             | 12.6            | 0.48             | 2.80            | 1.07            | 6.40           | 1.12                | 6.70               |
| whc1    | 15.92              | 7.21              | 0.27              | 2.32             | 14.6            | -0.05            | -0.30           | 1.77            | 11.10          | 1.87                | 11.80              |
| whit    | 6.47               | 3.88              | 0.26              | 0.77             | 10.8            | 0.66             | 10.10           | 0.58            | 9.00           | 0.59                | 9.20               |
| will    | 9.26               | 4.64              | 0.25              | 0.98             | 9.9             | 0.68             | 7.40            | 0.83            | 9.00           | 0.87                | 9.40               |
| wlsn    | 7.05               | 4.50              | 0.33              | 1.49             | 21.2            | 0.01             | 0.10            | 0.90            | 12.80          | 0.97                | 13.80              |
| wslr    | 11.81              | 4.94              | 0.35              | 1.48             | 13.2            | -0.60            | -5.10           | 1.10            | 9.30           | 1.10                | 9.30               |
| wtzr    | 13.52              | 6.70              | 0.25              | 1.54             | 11.0            | 0.52             | 3.90            | 0.78            | 5.80           | 0.89                | 6.60               |
| wuhn    | 29.75              | 17.96             | 0.34              | 3.17             | 10.2            | 1.27             | 4.30            | 1.68            | 5.60           | 1.82                | 6.10               |
| yell    | 9.05               | 6.65              | 0.28              | 1.00             | 10.2            | 0.70             | 7.80            | 0.90            | 10.00          | 0.93                | 10.30              |
| zimm    | 12.78              | 6.23              | 0.27              | 1.81             | 13.9            | 0.27             | 2.10            | 0.91            | 7.20           | 1.04                | 8.10               |
